# Supplementary material for: Effective cancer immunotherapy by natural mouse conventional type-1 dendritic cells bearing dead tumor antigen
Source: PubMed Central journal article supplement (PMC6454603; doi:10.1186/s40425-019-0565-5), 2019-04-08
Supplement: 40425_2019_565_MOESM1_ESM.pdf [file 40425_2019_565_MOESM1_ESM.pdf]

# **Effective cancer immunotherapy by natural mouse conventional type-1 dendritic cells bearing dead tumor antigen**

Stefanie K. Wculek<sup>1</sup>, Joaquín Amores-Iniesta<sup>1</sup>, Ruth Conde-Garrosa<sup>1</sup>,  
Sofía C. Khouili<sup>1</sup>, Ignacio Melero<sup>2,3,4</sup> and David Sancho<sup>1,\*</sup>.

## **Additional file 1**

- Supplemental Figures S1-S6
- Supplemental Figure legends

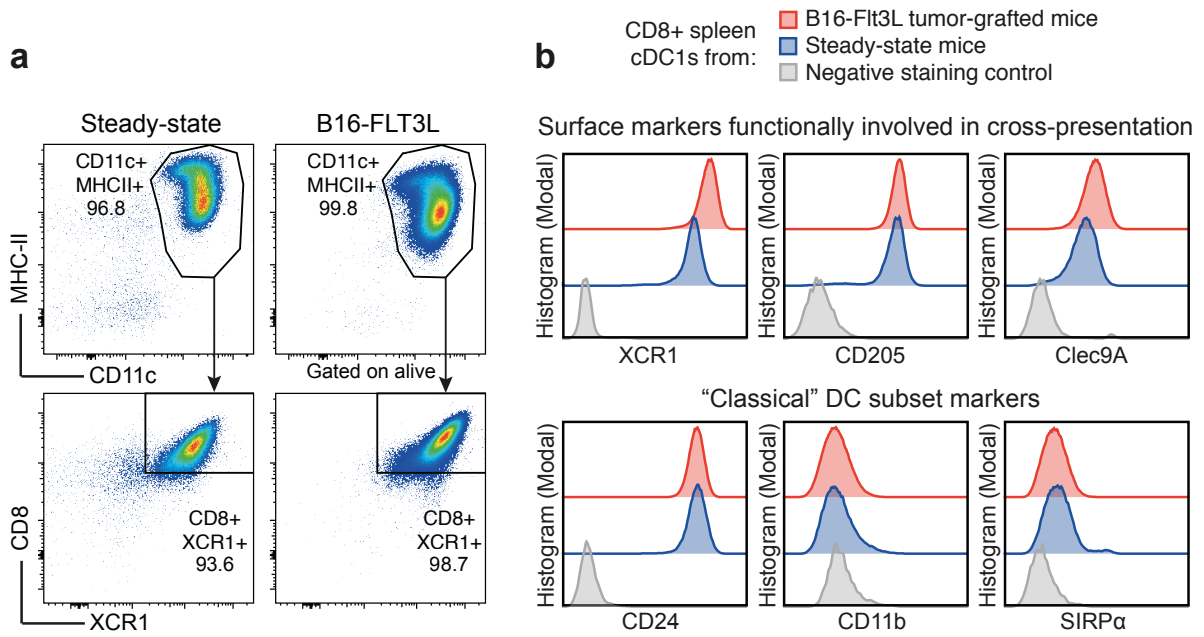

**Figure S1.** Isolation and phenotypic analysis of cDC1s from the spleen of FLT3L-expressing B16 tumor-bearing mice.

**a & b** CD8<sup>+</sup> cDC1s were isolated from steady-state mice or mice harboring subcutaneous B16-FLT3L tumors as described in Methods. Yield was about 10<sup>5</sup> cells/steady-state spleen and 1-5x10<sup>6</sup> cells/B16-Flt3L-expanded spleen. **a** Representative flow cytometric analysis of cell purity of cDC1 preparation. Isolated cells were gated on alive (upper panel) and CD11c<sup>+</sup> MHC-II<sup>+</sup> cells (lower panel). **b** Representative flow cytometric analysis of cell surface marker expression on isolated CD11c<sup>+</sup> MHC-II<sup>+</sup> CD8<sup>+</sup> cells. Antibody mix missing one antibody was used as negative staining control. One representative of ≥2 independent experiments is shown.



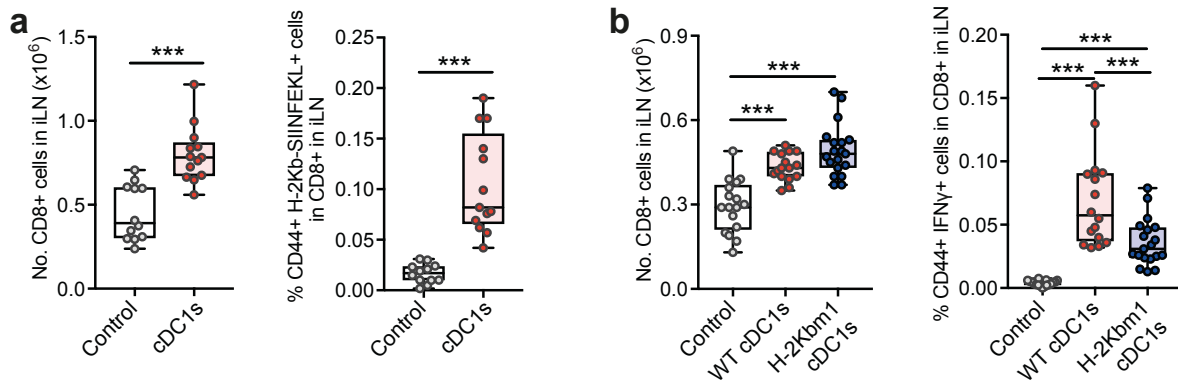

**Figure S3.** Adoptive cDC1 transfer-mediated endogenous CD8+ T cell responses are dependent on presentation on MHC-I of tumor Ag loaded onto cDC1s.

**a** Corresponding to Fig. 3b & c. Flow cytometric quantification of total CD8+ T cell number (left panel) and frequency of CD44+ H-2Kb-SIINFEKL+ within CD8+ T cells (right panel) in iLN 7 days after ID injection of control PBS or  $5 \times 10^5$  poly I:C and B16-OVA TCL-loaded cDC1s. Combined data of 3 independent experiments with total  $n=12$  (Control) and  $n=13$  (cDC1s) mice are shown. \*\*\* $P < 0.001$  by Student's *t* test. **b** Corresponding to Figure 3d-f. Flow cytometric quantification of total CD8+ T cell number (left panel) and frequency of CD44+ IFN $\gamma$ -producing cells after re-stimulation with OVA<sub>257-264</sub> peptide within CD8+ T cells (right panel) in iLN 7 days after ID injection of control PBS,  $5 \times 10^5$  poly I:C and B16-OVA TCL-loaded wildtype (WT) cDC1s or H-2K<sup>bm1</sup>-harboring cDC1s. Combined data of 3 independent experiments with total  $n=17$  (Control),  $n=16$  (WT cDC1s) and  $n=19$  (H-2K<sup>bm1</sup> cDC1s) mice are shown. \*\*\* $P < 0.001$  by one-way ANOVA and Tukey post hoc test.

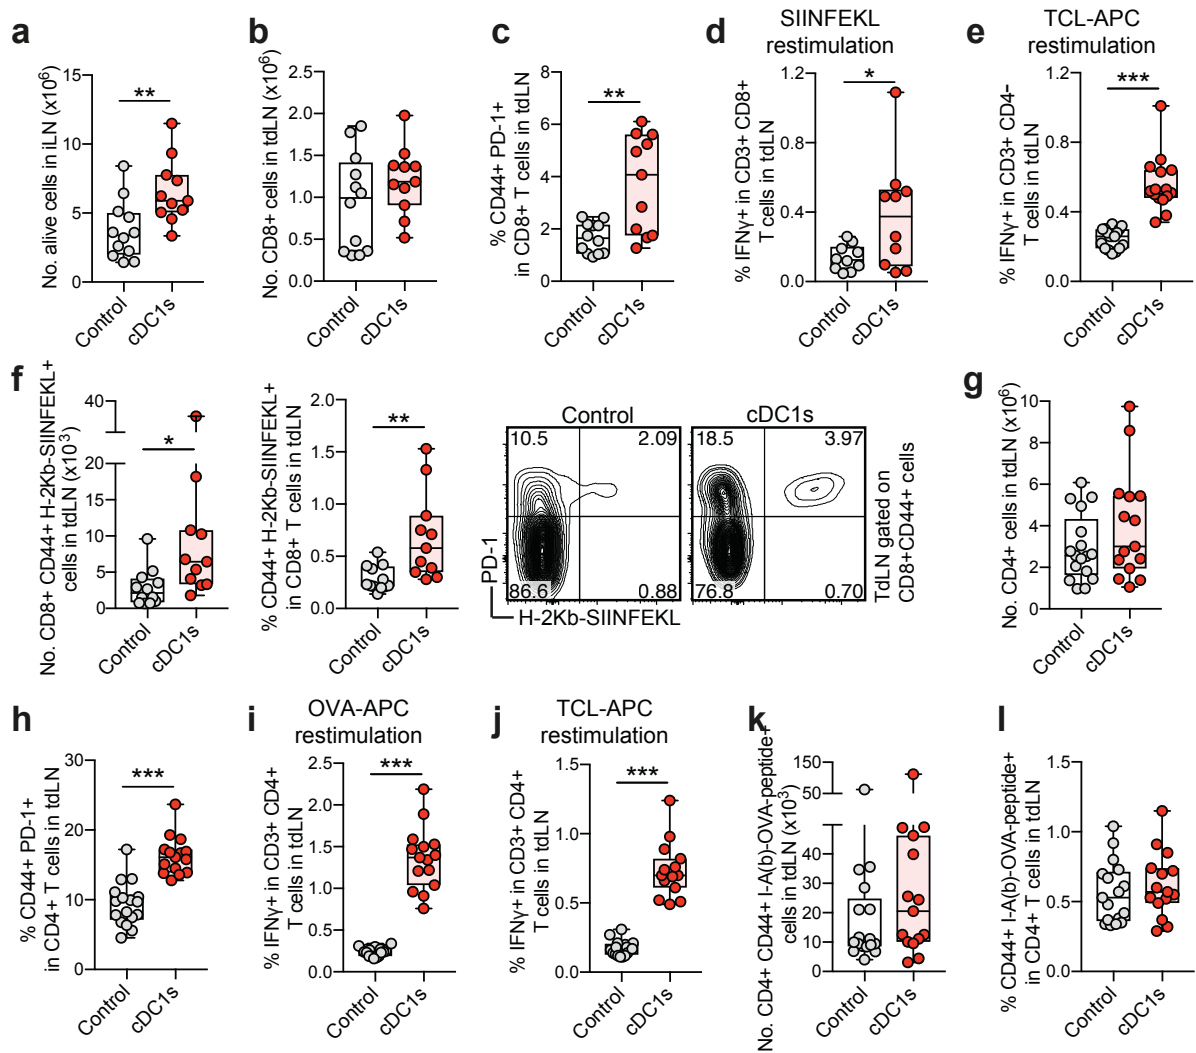

**Figure S4.** Analysis of T cells in tumor-draining lymph node after administration of tumor Ag-loaded cDC1s.

Corresponding to Fig. 5. B16-OVA tumor-bearing mice were intradermally injected with PBS control or  $10^6$  poly I:C and B16-OVA TCL-loaded cDC1s and T cell response in the tumor-draining lymph node (tdLN) analyzed 3 days thereafter. Flow cytometric quantification of **a** total tdLN cell number, **b** CD8+ T cell number, **c** frequency of CD44+ PD-1+ in CD8+ T cells, frequency of IFN $\gamma$ + in CD3+ CD8+ or CD3+ CD4- T cells after re-stimulation with **d** OVA<sub>257-264</sub> peptide or **e** B16-OVA TCL-loaded antigen-presenting cells (APCs), **f** CD8+ CD44+ H-2Kb-SIINFEKL+ T cell number and frequency with representative flow cytometric analysis (gated on CD8+ CD44+ cells), **g** CD4+ T cell number, **h** frequency of CD44+ PD-1+ in CD4+ T cells, frequency of IFN $\gamma$ + in CD3+ CD4+ T cells after re-stimulation with **i** OVA<sub>323-339</sub> peptide-loaded APCs or **j** B16-OVA TCL-loaded APCs, **k** number and **l** frequency of CD4+ CD44+ T cells positive for a OVA-specific MHC-II tetramer mix as indicated in Methods. Combined data of 2 independent experiments with total n=12-17 (Control) and n=11-15 (cDC1s) mice are shown. \*P<0.05, \*\*P<0.01, \*\*\*P<0.001 by Student's *t* test.

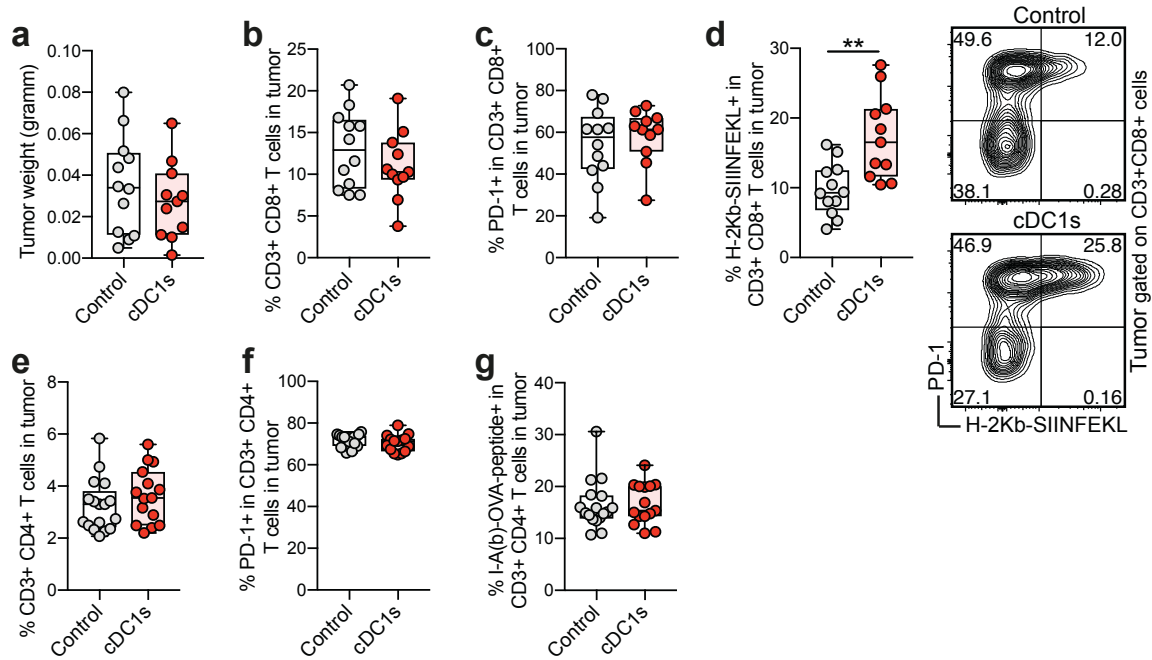

**Figure S5.** Analysis of T cells in tumor after administration of tumor Ag-loaded cDC1s. Corresponding to Fig. 5. B16-OVA tumor-bearing mice were intradermally injected with PBS control or  $10^6$  poly I:C and B16-OVA TCL-loaded cDC1s and T cell response in the tumor analyzed 3 days thereafter. **a** Quantification of tumor weight, flow cytometric quantification of **b** total CD3+ CD8+ T cell frequency, **c** frequency of PD-1+ in CD3+ CD8+ T cells, **d** frequency of H-2Kb- SIINFEKL+ in CD3+ CD8+ T cells with representative flow cytometric analysis (gated on CD3+ CD8+ cells), **e** total CD3+ CD4+ T cell frequency, **f** frequency of PD-1+ in CD3+ CD4+ T cells and **g** frequency of CD3+ CD4+ T cells positive for a OVA-specific MHC-II tetramer mix as indicated in Methods. Combined data of 2 independent experiments with total n=12-17 (Control) and n=11-15 (cDC1s) mice are shown. \*P<0.05, \*\*P<0.01, \*\*\*P<0.001 by Student's *t* test.

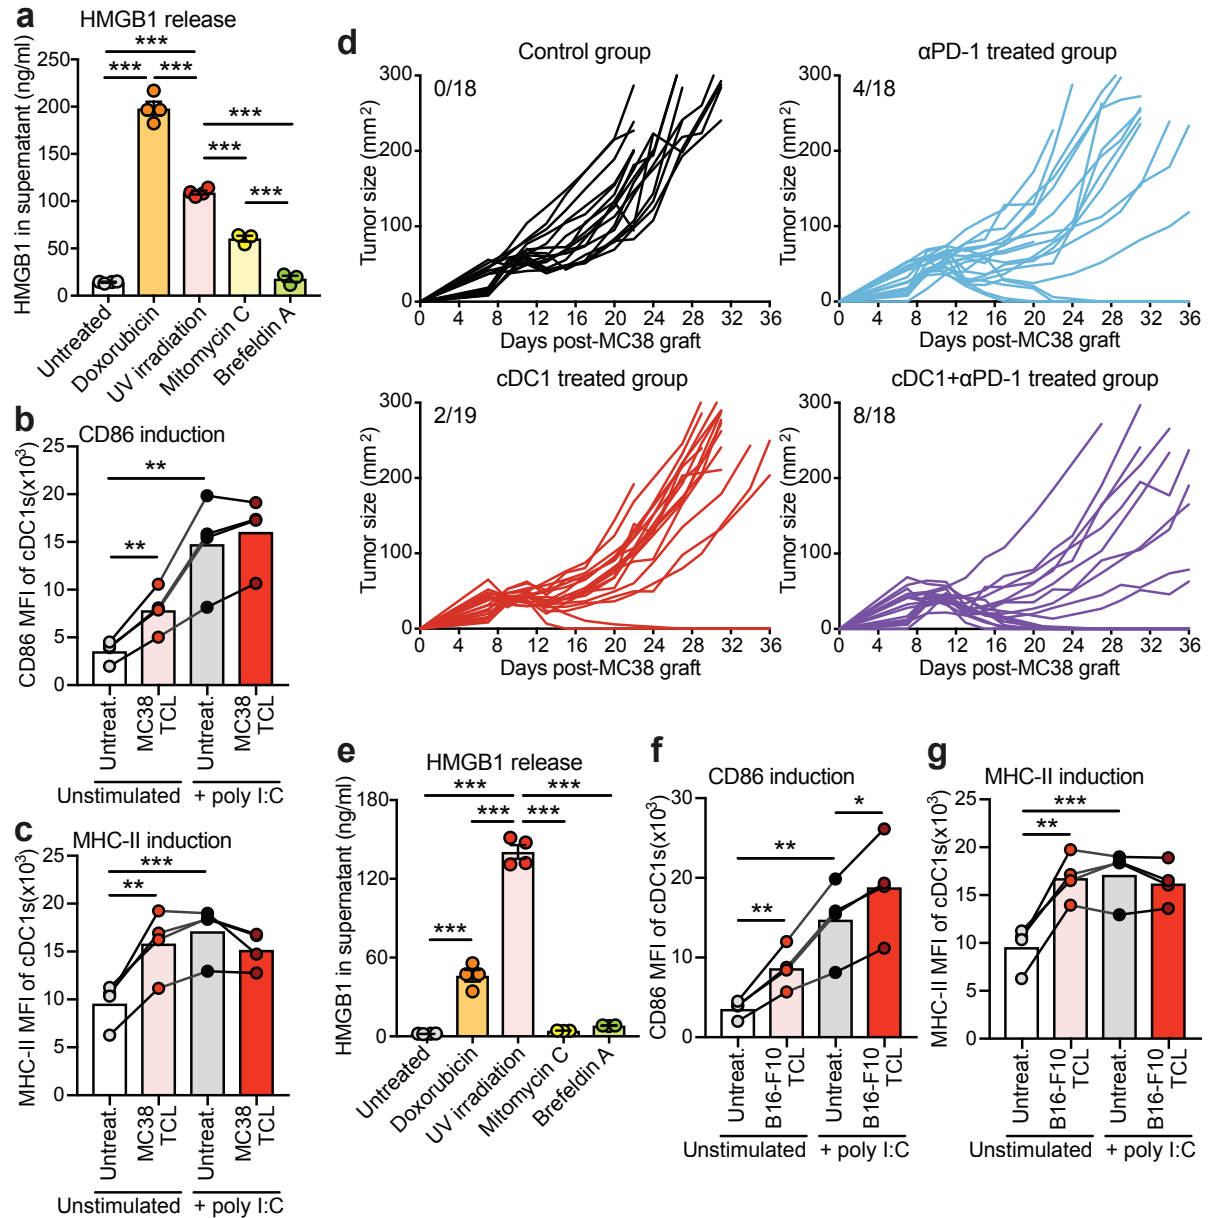

**Figure S6.** UV irradiation-induced ICD of MC38 and B16/F10 cancer cells results in HMGB1 release and cDC1 activation.

**a-d** Corresponding to Fig. 6 and **e-g** corresponding to Fig. 7. **a & e** HMGB1 content measured by ELISA in supernatants of **a** MC38 and **e** B16/F10 cells treated with 25 $\mu$ M doxorubicin, 300mJ/cm<sup>2</sup> UV irradiation, 30 $\mu$ M Mitomycin C or 50 $\mu$ M Brefeldin A and cultured for 18hrs (n=3-4). \*\*\*P<0.001 by one-way ANOVA and Tukey post hoc test. **b, c, f & g** Quantification of **b & f** CD86 and **c & g** MHC-II expression on untreated cDC1s (Untreat.), cDC1s treated for 1h with **b & c** MC38 tumor cell lysate (TCL) or **f & g** B16/F10 TCL in presence or absence of 20 $\mu$ g/ml poly I:C. cDC1s were washed and cultured for 4 hours followed by flow cytometric analysis. The same untreated control groups (white and gray) are presented in **b & f** as well as in **c & g**, because data belong to the same experiments and are split for clarity. Combined data of 4 independent experiments. \*P<0.05, \*\*P<0.01, \*\*\*P<0.001 by paired Student's *t* test. MFI, mean fluorescence intensity. **d** Individual tumor growth of mice subcutaneously grafted with 10<sup>6</sup> MC38 cancer cells followed by intradermal injection of PBS (Control and  $\alpha$ PD-1-treated

groups) or  $10^6$  poly I:C and autologous MC38 TCL-loaded cDC1s (cDC1s- and cDC1s+ $\alpha$ PD-1-treated groups) at day 6 & 13 days as well as intraperitoneal injection of PBS (Control and cDC1s-treated groups) or 100 $\mu$ g anti-PD-1 antibody ( $\alpha$ PD-1- and cDC1s+ $\alpha$ PD-1-treated groups) at day 7, 10, 14 & 17. Number of animals that rejected the tumor out of total mice/group are indicated in the upper left corner in every graph. Combined data of 2 independent experiments with total n=18 (Control,  $\alpha$ PD-1 and cDC1s+ $\alpha$ PD-1-treated groups) and n=19 (cDC1s-treated group) mice are shown.
